# Supplementary material
Source: PubMed Central journal article supplement (PMC3434228)
Supplement: NIHMS400186-supplement-Supplement.pdf [file NIHMS400186-supplement-Supplement.pdf]

## Supplementary Methods

### Patients and DNA samples

#### GWA studies

The two GWA studies on which the present analysis is based have been described in previously published literature<sup>1</sup>. Briefly, we analyzed the constitutional DNA of Caucasian patients diagnosed with childhood ALL from two patient cohorts: UK-GWA1 was based on 577 childhood ALL prevalent cases derived from the United Kingdom Childhood Cancer Study (UKCCS; 255 female, 322 male; mean age at diagnosis 5.5 years) an epidemiological study of childhood malignancies conducted between 1991 and 1998<sup>2</sup>; and UK-GWA2 on 392 childhood ALL incident cases derived from the UK Medical Research Council (MRC) ALL 97 (99) trial and 36 cases from Northern Institute for Cancer Research (NICR; 252 male; 176 female; mean age at diagnosis 5.8 years). Immunophenotyping and genotyping of diagnostic samples from patients was undertaken using standard methodologies. For controls we used genotype data from two publicly accessible data series for population SNP genotype frequencies; individuals from the 1958 Birth Cohort<sup>3</sup> and healthy individuals from a UK GWA study of colorectal cancer<sup>4</sup>. Genotyping of cases was conducted using Illumina Infinium HD Human370 Duo BeadChips according to the manufacturer's protocols (Illumina, San Diego, USA). A DNA sample was deemed to have failed if it generated genotypes at <95% of loci. Across both studies genotyped samples were excluded from analyses for the following reasons: failed genotyping (n=64), non-CEU ancestry (n=24) and cryptic relatedness (n=10). After removing failed samples UK-GWA1 consisted of 459 B-cell, 45 T-cell and UK-GWA2 of 365 B-cell and 38 T-cell cases; cytogenetic data were available on 632 individuals with B-cell ALL: hyperdiploid ALL ( $\geq 50$  chromosomes - B-hyperdiploid, n = 289); B-cell lineage with the *ETV6/RUNX1* (alias *TEL/AML1*) fusion (n = 126) and B-cell other (n = 217).

#### Replication series

**German case-control series:** The German case-control study comprised 1,427 patients (822 male and 605 female; mean age 6.2 years) with childhood ALL (1,193 B-cell, 235 T-cell ALL) ascertained through the BFM trials between 1993 and 2004. 1,516 controls (762 male and 754 female; mean age 5.8 years) were ethnically matched healthy individuals of German origin recruited in 2004 at the Institute of Transfusion Medicine, Mannheim (Germany).

**Canadian case-control series:** Subjects from the Quebec Childhood ALL (QcALL) study (n = 260) were diagnosed in the Division of Hematology-Oncology of Ste-Justine Hospital, Montréal, between October 1985 and November 2006. The criteria for inclusion were: complete clinical history, whites of French-Canadian origin residing in the Province of Quebec as judged by their names, languages and places of birth and availability of biological material. The recruited patients comprised 155 males and 105 females between the ages of 1 and 16 years (mean age of 5.3). The distribution of ALL subtypes as determined by immunophenotyping was as follows: 1 T-cell, 251 B-cell and 8 with undetermined lineage. A general population control group composed of 266 (152 males, 114 females) was randomly selected from a large DNA institutional bank. The criteria for inclusion in the control group were: anonymous, healthy and unrelated individuals recruited from the population served by Ste-Justine Hospital; whites of French-Canadian origin residing in the Province of Quebec as judged by their language and place of birth.

**Hungarian case-control series:** DNA was obtained from a retrospective series of 550 childhood ALL cases (mean age at diagnosis 6.1 years). Patients were diagnosed with ALL between 1990 and 2002, aged 1–15 years at diagnosis and treated in 10 Hungarian centres (304 males, 246 females). The cohort represents 51.0% of all diagnosed childhood ALL. In the majority DNA was extracted from remission bloods (n = 485), while from patients who died, DNA was obtained from bone marrow smears (n = 65)<sup>5</sup>. The 450 controls (174 male and 276 females; average age 38 years) of the same ethnicity and from the same geographical region as the patients were randomly selected from healthy blood donors. None of the controls had a personal history of any malignancy.

**Spanish case-control series:**

The Spanish cohort consisted of 148 childhood ALL prevalent cases (82 male, 66 female; mean age 5.8 years; 127 B-cell and 21 T-cell). Samples were collected between 2006 and 2008 from two Spanish hospitals (Hospital la Paz and Hospital Doce de Octubre, both in Madrid). The 187 controls were unrelated Spanish individuals (94 male and 93 female).

**Ethics**

Collection of blood samples and clinico-pathological information from subjects was undertaken with informed consent and relevant ethical review board approval in accordance with the tenets of the Declaration of Helsinki.

**Replication genotyping**

Genotyping of SNPs was conducted using either competitive allele-specific PCR KASPar chemistry (KBiosciences Ltd, Hertfordshire, UK) or single-base primer extension chemistry

MALDI-TOF MS detection (Sequenom, San Diego, USA). All primers and probes used are available on request. A series of DNAs, whose genotype was established by sequencing, was used to validate genotyping assays in individual centers. Genotyping quality control was further evaluated through inclusion of duplicate DNA samples in SNP assays. For all SNP assays >99% concordant results were obtained. Samples having SNP call rates <90% were excluded from the analysis.

### Statistical analysis

Statistical analyses were undertaken using R (v2.6) and STATA (v10; State College, Texas, US) software. Deviation of the genotype frequencies in the controls from those expected under HWE was assessed by a  $\chi^2$  test. The association between each SNP and risk of ALL was assessed by the Cochran-Armitage trend test. Odds ratios and associated 95% CIs were calculated by unconditional logistic regression. Relationships between multiple SNPs showing association with ALL risk in the 9p21.3 region were investigated using logistic regression analysis, and the impact of additional SNPs from the same region was assessed by a likelihood-ratio test. Meta-analysis was conducted using standard methods<sup>6</sup>. Cochran's Q statistic to test for heterogeneity and the  $I^2$  statistic to quantify the proportion of the total variation due to heterogeneity were calculated<sup>7</sup>. Large heterogeneity is typically defined as  $I^2 \geq 75\%$ . The population attributable fraction was estimated from  $1 - \prod_i 1 - (x_i - 1)/x_i$  where  $x_i = (1-p)^2 + 2p(1-p)OR_1 + p^2OR_2$ ,  $p$  is the population allele frequency, and  $OR_1$  and  $OR_2$  are the ORs associated with hetero- and homozygosity respectively. The relationship between SNP genotype and molecular and immunophenotypic subgroups was examined by case-only analysis using logistic regression.

### Bioinformatics

LD metrics between SNPs reported in HapMap were based on Data Release 2/phase III Feb09 on NCBI B35 assembly, dbSNPb125. We used Haploview software (v3.2) for haplotype analysis and to infer the LD structure of the 174kb region at 9p21.3 (from 21,942,000 to 22,146,000 bps on NCBI B35). Prediction of the untyped SNPs in the UK GWA studies was carried out using IMPUTE (v2) based on phased haplotypes from HapMap phase III (January 2007 on NCBI B35 assembly, dbSNP build 125) and 1000Genomes data. Subsequent analysis was done using SNPTEST and LD metrics for SNPs not in HapMap were calculated from the imputed data.

Using the Margarita program we inferred ARGs for 27-SNP haplotypes mapping to the 174kb region of 9p21.3<sup>8</sup>. For every ARG, a putative risk mutation was placed on the marginal genealogy at each SNP position by maximizing the association between the mutation and disease status. We evaluated the significance of this observed association through  $10^6$  permutations on the phenotypes. To annotate potential regulatory sequences within the 174kb

region we implemented *in silico* searches using Transfac Matrix Database v7.2<sup>9</sup>, PReMod<sup>10</sup> and EEL<sup>11</sup> software.

### **Relationship between rs3731217 genotype and *CDKN2A*, and *CDKN2B* expression**

To examine for a relationship between SNP genotype and expression levels of *CDKN2A* and *CDKN2B* in lymphocytes, we made use of publicly available expression data generated from analysis of 90 Caucasian derived Epstein-Barr virus-transformed lymphoblastoid cell lines using Sentrix Human-6 Expression BeadChips (Illumina, San Diego, USA)<sup>12</sup>. Online recovery of data was performed using WGAVIEWER v1.25 Software. Differences in the distribution of levels of mRNA expression between SNP genotypes were compared using a Wilcoxon-type test for trend<sup>13</sup>.

### **9p21.3 (*CDKN2A*) copy number analysis in ALL**

To study the relationship between rs3731217 genotype and 9p21.3 monoallelic/bioallelic deletion in ALL we made use of previously generated data on: (1) a subset of 66 UK-GWA2 cases<sup>14</sup>. Genomic copy number for 9p21.3 was evaluated using arrayCGH, FISH or SNP arrays in diagnostic or relapse samples as previously described<sup>14</sup>; (2) 387 of the German cases - deletion status in leukemic clones was determined using 50k GeneChip Human mapping array (XbaI 240, Affymetrix) as previously reported<sup>15</sup>. Fisher's exact test was used to evaluate relationship between carrier status and *CDKN2A/CDKN2B* deletion.

### **Relationship between rs3731217 genotype and clinical outcome**

Follow-up data were available for 378 ALL97(99) trial patients and 1,302 German BFM patients. Difference in patient outcome by genotype was assessed by Log rank comparison of Kaplan-Meier survival curves.

## **SUPPLEMENTARY MATERIAL**

**Supplementary Table 1: 34 SNPs genotyped in the German case-control series.**

**Supplementary Table 2: Details of directly typed SNPs and those imputed from HapMap and 1000Genomes data for UK-GWA1 and UK-GWA2.** Only those SNPs with a high quality score as shown by the information score and having  $P$  value of  $< 0.05$  are shown. The five imputed loci with  $P < 10^{-3}$  are bolded and rs3731217 is in blue.

**Supplementary Table 3: Details of haplotype, logistic regression and ARG analysis of the 174kb region encompassing rs3731217.** (a) Haplotypes analysis of rs3731239, rs2811709,

rs4074785, rs3731217, rs2811712, rs3218018. (b) Single SNP and conditional (on rs3731217) logistic regression analysis. (c) Results from ARG analysis using Margarita.

**Supplementary Table 4: Correlation between carrier status for the rs3731217 (*CDKN2A*) risk allele and deletion of the locus in leukemic blasts in an available subset of the German and UK-GWA2 cases.** Confidence intervals were calculated using Fisher's exact test.

**Supplementary table 5: Pair-wise linkage disequilibrium between rs3731217 and SNPs within the region based on phased genotype data from HapMap.** The amino acid change of each SNP is shown.

**Supplementary Table 6: Details of transcription binding sites (TFBSs) as predicted by EEL (using binding profiles from the JASPAR2 database) and the Transfac Matrix Database. The positions of 3 transcriptional regulatory modules as predicted by PReMod are also shown.** "Score" refers to the confidence value assigned to each predicted binding region by the three different programs. The predicted binding sites cluster in 3 regions (highlighted red, green and blue). For comparison, the observed and imputed SNPs and associated *P* values are shown.

**Supplementary Figure 1: Details of the 174kb LD region at 9p21.3.** (a) LD statistics ( $r^2$ ) from HapMap phase II data. The darker shading indicates strong LD between SNPs. (b) Sequence conservation across the region in mammals. (c) Regions with high densities of TFBSs are shown: modules (predicted by PReMod) and groups (predicted by EEL and the Transfac Matrix Database). Also shown are the positions of the genes encoded by the region and the position of rs3731217.

**Supplementary Figure 2: Relationship between event-free survival and rs3731217 genotype.** Kaplan-Meier event-free survival curves are shown for 378 MRC97(99) patients from UK-GWA2 study.

**Supplementary Figure 3: Relationship between rs3731217 genotypes and normalized lymphocyte *CDKN2A* and *CDKN2B* mRNA expression.** Expression of genes (normalized –  $\log_2$  levels) is based on data from analysis of 90 Epstein-Barr virus–transformed lymphoblastoid cell lines using Sentrix Human-6 Expression BeadChip (Illumina, San Diego, USA)<sup>12,16</sup>. Data was recovered using WGAViewer Version 1.25. Differences in the distribution of expression by SNP genotype were compared using a Wilcoxon-type test for trend<sup>13</sup>.

## REFERENCES

1. Papaemmanuil, E. et al. Loci on 7p12.2, 10q21.2 and 14q11.2 are associated with risk of childhood acute lymphoblastic leukemia. *Nat Genet* **41**, 1006-10 (2009).
2. The United Kingdom Childhood Cancer Study: objectives, materials and methods. UK Childhood Cancer Study Investigators. *Br J Cancer* **2000** **82**, 1073-102.
3. Power, C. & Elliott, J. Cohort profile: 1958 British birth cohort (National Child Development Study). *Int J Epidemiol* **35**, 34-41 (2006).
4. Tomlinson, I.P. et al. A genome-wide association study identifies colorectal cancer susceptibility loci on chromosomes 10p14 and 8q23.3. *Nat Genet* **40**, 623-30 (2008).
5. Semsei, A.F. et al. Association of some rare haplotypes and genotype combinations in the MDR1 gene with childhood acute lymphoblastic leukaemia. *Leuk Res* **32**, 1214-20 (2008).
6. Pettiti, D. Meta-analysis Decision Analysis and Cost-effectiveness Analysis. . *Oxford University Press, Oxford, New York* (1994).
7. Higgins, J.P. & Thompson, S.G. Quantifying heterogeneity in a meta-analysis. *Stat Med* **21**, 1539-58 (2002).
8. Minichiello, M.J. & Durbin, R. Mapping trait loci by use of inferred ancestral recombination graphs. *Am J Hum Genet* **79**, 910-22 (2006).
9. Matys, V. et al. TRANSFAC and its module TRANSCCompel: transcriptional gene regulation in eukaryotes. *Nucleic Acids Res* **34**, D108-10 (2006).
10. Ferretti, V. et al. PReMod: a database of genome-wide mammalian cis-regulatory module predictions. *Nucleic Acids Res* **35**, D122-6 (2007).
11. Hallikas, O. et al. Genome-wide prediction of mammalian enhancers based on analysis of transcription-factor binding affinity. *Cell* **124**, 47-59 (2006).
12. Stranger, B.E. et al. Genome-wide associations of gene expression variation in humans. *PLoS Genet* **1**, e78 (2005).
13. Cuzick, J. A Wilcoxon-type test for trend. *Stat Med.* **4**, 87-90. (1985 ).
14. Sulong, S. et al. A comprehensive analysis of the CDKN2A gene in childhood acute lymphoblastic leukemia reveals genomic deletion, copy number neutral loss of heterozygosity, and association with specific cytogenetic subgroups. *Blood* **113**, 100-7 (2009).
15. Kawamata, N. et al. Molecular allelokaryotyping of pediatric acute lymphoblastic leukemias by high-resolution single nucleotide polymorphism oligonucleotide genomic microarray. *Blood* **111**, 776-84 (2008).
16. Stranger, B.E. et al. Relative impact of nucleotide and copy number variation on gene expression phenotypes. *Science* **315**, 848-53 (2007).

| SNP        | Chr. | Location (bp) | Nearby gene(s)        | Minor allele | UK-GWA1 cases MAF (n=504) | UK-GWA1 control MAF (n=1438) | UK-GWA2 case MAF (n=403) | UK-GWA2 control MAF (n=960) | UK meta analysis <i>P</i> value | German case MAF (n=1,427) | German control MAF (n=1,516) | German <i>P</i> value |
|------------|------|---------------|-----------------------|--------------|---------------------------|------------------------------|--------------------------|-----------------------------|---------------------------------|---------------------------|------------------------------|-----------------------|
| rs11799849 | 1    | 20,647,937    | -                     | A            | 0.502                     | 0.437                        | 0.485                    | 0.444                       | 8.17x10 <sup>-5</sup>           | 0.464                     | 0.468                        | 0.727                 |
| rs17115122 | 1    | 96,641,799    | -                     | A            | 0.095                     | 0.125                        | 0.089                    | 0.123                       | 4.08x10 <sup>-4</sup>           | 0.106                     | 0.121                        | 0.077                 |
| rs4853946  | 2    | 2,215,288     | MYT1L                 | G            | 0.437                     | 0.493                        | 0.429                    | 0.484                       | 5.17x10 <sup>-5</sup>           | 0.483                     | 0.473                        | 0.464                 |
| rs896232   | 2    | 2,711,884     | -                     | T            | 0.404                     | 0.352                        | 0.384                    | 0.329                       | 5.56x10 <sup>-5</sup>           | 0.356                     | 0.368                        | 0.362                 |
| rs2130904  | 4    | 31,874,929    | -                     | G            | 0.345                     | 0.297                        | 0.351                    | 0.704                       | 6.16x10 <sup>-5</sup>           | 0.307                     | 0.316                        | 0.503                 |
| rs10002424 | 4    | 65,427,118    | -                     | C            | 0.257                     | 0.216                        | 0.265                    | 0.220                       | 2.31x10 <sup>-4</sup>           | 0.225                     | 0.210                        | 0.160                 |
| rs405510   | 5    | 117,001,879   | -                     | G            | 0.287                     | 0.345                        | 0.317                    | 0.358                       | 1.67x10 <sup>-4</sup>           | 0.347                     | 0.343                        | 0.763                 |
| rs10061417 | 5    | 120,793,117   | -                     | G            | 0.161                     | 0.202                        | 0.151                    | 0.185                       | 4.19x10 <sup>-4</sup>           | 0.193                     | 0.195                        | 0.883                 |
| rs1800197  | 5    | 177,352,573   | PROP1                 | A            | 0.263                     | 0.303                        | 0.254                    | 0.305                       | 4.07x10 <sup>-4</sup>           | 0.259                     | 0.289                        | 0.012                 |
| rs7448421  | 5    | 178,236,474   | ZNF354B; ZFP2         | C            | 0.205                     | 0.247                        | 0.224                    | 0.266                       | 4.50x10 <sup>-4</sup>           | 0.237                     | 0.245                        | 0.471                 |
| rs1336767  | 6    | 124,856,989   | TCBA1                 | A            | 0.083                     | 0.061                        | 0.098                    | 0.067                       | 4.38x10 <sup>-4</sup>           | 0.062                     | 0.060                        | 0.738                 |
| rs11764793 | 7    | 115,618,496   | TES                   | A            | 0.647                     | 0.587                        | 0.621                    | 0.586                       | 2.67x10 <sup>-4</sup>           | 0.416                     | 0.405                        | 0.401                 |
| rs7835507  | 8    | 10,212,547    | MSRA                  | A            | 0.150                     | 0.121                        | 0.145                    | 0.112                       | 9.21x10 <sup>-4</sup>           | 0.131                     | 0.133                        | 0.825                 |
| rs6997224  | 8    | 10,213,773    | MSRA                  | C            | 0.185                     | 0.145                        | 0.181                    | 0.132                       | 1.39x10 <sup>-5</sup>           | 0.152                     | 0.156                        | 0.670                 |
| rs10511573 | 9    | 12,194,748    | -                     | C            | 0.335                     | 0.284                        | 0.351                    | 0.301                       | 5.62x10 <sup>-5</sup>           | 0.321                     | 0.308                        | 0.248                 |
| rs3731217  | 9    | 21,974,661    | CDKN2A; CDKN2B        | G            | 0.108                     | 0.141                        | 0.108                    | 0.140                       | 5.42x10 <sup>-4</sup>           | 0.101                     | 0.147                        | 1.15x10 <sup>-7</sup> |
| rs1331876  | 9    | 28,366,185    | LINGO2                | T            | 0.316                     | 0.271                        | 0.344                    | 0.293                       | 1.79x10 <sup>-4</sup>           | 0.326                     | 0.297                        | 0.014                 |
| rs1001919  | 9    | 108,331,482   | -                     | C            | 0.172                     | 0.214                        | 0.188                    | 0.240                       | 4.57x10 <sup>-5</sup>           | 0.217                     | 0.215                        | 0.821                 |
| rs872863   | 9    | 125,194,175   | DENND1A; CRB2         | T            | 0.083                     | 0.055                        | 0.094                    | 0.066                       | 5.77x10 <sup>-5</sup>           | 0.083                     | 0.075                        | 0.225                 |
| rs11188661 | 10   | 97,950,983    | BLNK; ZNF518A         | A            | 0.315                     | 0.346                        | 0.273                    | 0.336                       | 5.46x10 <sup>-4</sup>           | 0.326                     | 0.328                        | 0.817                 |
| rs11188664 | 10   | 97,952,507    | BLNK; ZNF518A         | G            | 0.365                     | 0.417                        | 0.346                    | 0.405                       | 3.91x10 <sup>-5</sup>           | 0.407                     | 0.392                        | 0.249                 |
| rs7084370  | 10   | 113,126,069   | -                     | G            | 0.549                     | 0.498                        | 0.530                    | 0.466                       | 3.94x10 <sup>-4</sup>           | 0.487                     | 0.487                        | 0.987                 |
| rs12582396 | 12   | 12,627,386    | DUSP16; CREBL2        | T            | 0.101                     | 0.075                        | 0.133                    | 0.088                       | 1.08x10 <sup>-5</sup>           | 0.092                     | 0.103                        | 0.129                 |
| rs10877094 | 12   | 56,984,007    | -                     | C            | 0.220                     | 0.179                        | 0.231                    | 0.810                       | 1.41x10 <sup>-4</sup>           | 0.197                     | 0.203                        | 0.599                 |
| rs7971479  | 12   | 67,533,750    | CPM; MDM2             | T            | 0.228                     | 0.194                        | 0.239                    | 0.184                       | 1.20x10 <sup>-4</sup>           | 0.228                     | 0.234                        | 0.582                 |
| rs7317221  | 13   | 69,038,099    | -                     | C            | 0.228                     | 0.186                        | 0.255                    | 0.203                       | 5.66x10 <sup>-5</sup>           | 0.209                     | 0.210                        | 0.899                 |
| rs1832050  | 13   | 104,303,225   | -                     | A            | 0.105                     | 0.139                        | 0.103                    | 0.144                       | 1.03x10 <sup>-4</sup>           | 0.139                     | 0.138                        | 0.935                 |
| rs5021303  | 15   | 75,869,833    | -                     | G            | 0.182                     | 0.233                        | 0.198                    | 0.236                       | 7.51x10 <sup>-4</sup>           | 0.224                     | 0.228                        | 0.771                 |
| rs567379   | 18   | 65,051,399    | -                     | T            | 0.220                     | 0.258                        | 0.204                    | 0.250                       | 3.73x10 <sup>-4</sup>           | 0.247                     | 0.226                        | 0.060                 |
| rs2284378  | 20   | 32,051,756    | RALY; EIF2S2          | T            | 0.381                     | 0.331                        | 0.373                    | 0.326                       | 2.46x10 <sup>-4</sup>           | 0.293                     | 0.317                        | 0.051                 |
| rs4911414  | 20   | 32,193,105    | RALY; EIF2S2          | T            | 0.395                     | 0.350                        | 0.391                    | 0.343                       | 4.67x10 <sup>-4</sup>           | 0.304                     | 0.331                        | 0.027                 |
| rs2903908  | 20   | 44,127,354    | NCOA5; SLC12A5        | C            | 0.217                     | 0.278                        | 0.231                    | 0.267                       | 3.77x10 <sup>-5</sup>           | 0.275                     | 0.286                        | 0.360                 |
| rs6027571  | 20   | 58,395,771    | -                     | C            | 0.354                     | 0.409                        | 0.362                    | 0.430                       | 1.02x10 <sup>-5</sup>           | 0.421                     | 0.419                        | 0.903                 |
| rs9613221  | 22   | 25,316,826    | CRYBB1; CRYBA4; TPST2 | G            | 0.211                     | 0.178                        | 0.239                    | 0.183                       | 9.13x10 <sup>-5</sup>           | 0.029                     | 0.198                        | 0.318                 |

Supplementary Table 1: 34 SNPs genotyped in the German case-control series.

| Dataset            | SNP               | Location (bp)     | Information score | P value                     | r <sup>2</sup> with rs3731217 | D' with r3731217 |
|--------------------|-------------------|-------------------|-------------------|-----------------------------|-------------------------------|------------------|
| 1000Genomes        | rs56018935        | 21,956,527        | 0.94              | 1.13x10 <sup>-3</sup>       | 0.02                          | 1.00             |
| <b>1000Genomes</b> | <b>rs2518719</b>  | <b>21,960,427</b> | <b>0.96</b>       | <b>1.09x10<sup>-4</sup></b> | <b>0.81</b>                   | <b>0.97</b>      |
| 1000Genomes        | rs3731246         | 21,961,989        | 0.95              | 2.46x10 <sup>-3</sup>       | 0.02                          | 1.00             |
| 1000Genomes        | rs2518721         | 21,969,204        | 0.97              | 4.39x10 <sup>-3</sup>       | 0.02                          | 1.00             |
| UK-GWA1&2          | rs2811709         | 21,970,151        | 1.00              | 0.017                       | 0.02                          | 1.00             |
| <b>1000Genomes</b> | <b>rs13297747</b> | <b>21,970,941</b> | <b>0.97</b>       | <b>7.01x10<sup>-4</sup></b> | <b>0.99</b>                   | <b>1.00</b>      |
| <b>1000Genomes</b> | <b>rs3731222</b>  | <b>21,973,914</b> | <b>0.98</b>       | <b>5.26x10<sup>-4</sup></b> | <b>1.00</b>                   | <b>1.00</b>      |
| UK-GWA1&2          | rs3731217         | 21,974,661        | 1.00              | 3.87x10 <sup>-4</sup>       | 1.00                          | 1.00             |
| <b>1000Genomes</b> | <b>rs3731204</b>  | <b>21,977,584</b> | <b>0.98</b>       | <b>5.52x10<sup>-4</sup></b> | <b>1.00</b>                   | <b>1.00</b>      |
| 1000Genomes        | rs10757262        | 21,977,874        | 0.94              | 0.025                       | 0.02                          | 1.00             |
| HapMap/1000Genomes | rs3731201         | 21,978,896        | 0.95              | 0.028                       | 0.03                          | 1.00             |
| <b>1000Genomes</b> | <b>rs3731198</b>  | <b>21,979,477</b> | <b>0.94</b>       | <b>4.46x10<sup>-4</sup></b> | <b>0.96</b>                   | <b>1.00</b>      |
| 1000Genomes        | 9-21985941        | 21,985,941        | 0.95              | 1.61x10 <sup>-3</sup>       | 0.02                          | 0.97             |
| UK-GWA1&2          | rs2811712         | 21,988,035        | 1.00              | 0.020                       | 0.02                          | 0.95             |
| UK-GWA1&2          | rs3218018         | 21,988,139        | 1.00              | 4.83x10 <sup>-3</sup>       | 0.02                          | 0.96             |
| 1000Genomes        | rs3218007         | 21,989,800        | 0.98              | 0.011                       | 0.02                          | 0.96             |
| 1000Genomes        | rs3218005         | 21,990,247        | 0.98              | 0.011                       | 0.02                          | 0.96             |
| UK-GWA1&2          | rs2069426         | 21,996,273        | 1.00              | 5.26x10 <sup>-4</sup>       | 0.02                          | 0.96             |
| HapMap/1000Genomes | rs974336          | 21,996,348        | 0.99              | 0.020                       | 0.02                          | 0.96             |
| UK-GWA1&2          | rs2069422         | 21,998,026        | 1.00              | 9.87x10 <sup>-3</sup>       | 0.02                          | 0.96             |
| 1000Genomes        | 9-22002441        | 22,002,441        | 0.98              | 0.013                       | 0.02                          | 0.96             |
| HapMap/1000Genomes | rs10965212        | 22,013,795        | 0.98              | 0.032                       | 0.01                          | 0.28             |
| 1000Genomes        | 9-22015432        | 22,015,432        | 0.98              | 0.013                       | 0.02                          | 0.96             |
| 1000Genomes        | 9-22015885        | 22,015,885        | 0.98              | 0.013                       | 0.02                          | 0.96             |
| 1000Genomes        | rs1591136         | 22,016,834        | 0.99              | 0.026                       | 0.01                          | 0.28             |
| 1000Genomes        | rs598664          | 22,017,551        | 0.97              | 0.014                       | 0.02                          | 0.96             |
| HapMap/1000Genomes | rs7049105         | 22,018,801        | 0.99              | 0.032                       | 0.01                          | 0.28             |
| HapMap/1000Genomes | rs10965215        | 22,019,445        | 0.99              | 0.043                       | 0.01                          | 0.27             |
| 1000Genomes        | rs4977753         | 22,020,027        | 0.99              | 0.028                       | 0.01                          | 0.28             |
| HapMap/1000Genomes | rs662463          | 22,020,438        | 0.97              | 0.017                       | 0.02                          | 0.95             |
| 1000Genomes        | rs10115049        | 22,022,119        | 0.99              | 0.031                       | 0.01                          | 0.28             |
| 1000Genomes        | 9-22023824        | 22,023,824        | 0.98              | 0.019                       | 0.02                          | 0.97             |
| UK-GWA1&2          | rs2151280         | 22,024,719        | 1.00              | 0.045                       | 0.01                          | 0.27             |
| 1000Genomes        | 9-22030839        | 22,030,839        | 0.98              | 0.022                       | 0.02                          | 0.96             |
| 1000Genomes        | 9-22031155        | 22,031,155        | 0.98              | 0.022                       | 0.02                          | 0.96             |
| 1000Genomes        | rs1360590         | 22,031,443        | 0.99              | 0.043                       | 0.01                          | 0.27             |
| 1000Genomes        | rs1333036         | 22,033,819        | 0.99              | 0.033                       | 0.01                          | 0.27             |
| 1000Genomes        | rs1333035         | 22,034,059        | 0.98              | 0.018                       | 0.02                          | 0.96             |
| UK-GWA1&2          | rs1333034         | 22,034,122        | 1.00              | 0.028                       | 0.02                          | 0.96             |
| 1000Genomes        | rs17694555        | 22,041,295        | 0.93              | 3.06x10 <sup>-3</sup>       | 0.01                          | 0.96             |
| HapMap/1000Genomes | rs17756311        | 22,043,895        | 0.94              | 0.016                       | 0.01                          | 0.96             |
| 1000Genomes        | 9-22044164        | 22,044,164        | 0.93              | 3.16x10 <sup>-3</sup>       | 0.01                          | 0.96             |
| HapMap/1000Genomes | rs17694572        | 22,044,356        | 0.94              | 0.014                       | 0.01                          | 0.96             |
| UK-GWA1&2          | rs10120688        | 22,046,499        | 1.00              | 0.035                       | 0.01                          | 0.22             |
| 1000Genomes        | 9-22047530        | 22,047,530        | 0.96              | 5.30x10 <sup>-3</sup>       | 0.01                          | 0.96             |
| 1000Genomes        | 9-22049061        | 22,049,061        | 0.95              | 2.57x10 <sup>-3</sup>       | 0.01                          | 0.92             |
| 1000Genomes        | 9-22050833        | 22,050,833        | 0.98              | 0.014                       | 0.03                          | 0.92             |
| UK-GWA1&2          | rs1011970         | 22,052,134        | 1.00              | 0.016                       | 0.03                          | 0.92             |
| 1000Genomes        | rs10811647        | 22,055,002        | 0.98              | 0.016                       | 0.00                          | 0.01             |
| HapMap/1000Genomes | rs10811650        | 22,057,593        | 0.98              | 0.014                       | 0.00                          | 0.01             |
| UK-GWA1&2          | rs1547705         | 22,072,375        | 1.00              | 1.73x10 <sup>-3</sup>       | 0.05                          | 0.24             |

**Supplementary Table 2: Details of directly typed SNPs and those imputed from HapMap phase III and 1000Genomes data for UK-GWA1 and UK-GWA2.** Only those SNPs with a high quality score as shown by the information score and having  $P < 0.05$  are shown. The five imputed loci with  $P < 10^{-3}$  are bolded and rs3731217 is in blue.



(a)

| Haplotype | Case frequency | Control frequency | <i>P</i> value        |
|-----------|----------------|-------------------|-----------------------|
| CGGTAA    | 0.399          | 0.379             | 0.1328                |
| TGGTAA    | 0.26           | 0.266             | 0.571                 |
| TGGGAA    | 0.107          | 0.141             | $2.93 \times 10^{-4}$ |
| TAGTGC    | 0.108          | 0.089             | 0.0188                |
| TGATAA    | 0.081          | 0.082             | 0.9101                |
| TAGTAA    | 0.024          | 0.022             | 0.5874                |

(b)

| SNP        | Location (bp) | Single SNP <i>P</i> value | <i>P</i> value conditional on rs3731217 |
|------------|---------------|---------------------------|-----------------------------------------|
| rs10757260 | 21,943,137    | 0.1801                    | 0.7265                                  |
| rs7041637  | 21,951,866    | 0.6619                    | 0.7561                                  |
| rs2811708  | 21,963,422    | 0.1737                    | 0.3010                                  |
| rs3731239  | 21,964,218    | 0.1188                    | 0.6457                                  |
| rs2811709  | 21,970,151    | 0.0190                    | 0.0768                                  |
| rs4074785  | 21,971,583    | 0.8950                    | 0.5453                                  |
| rs2811712  | 21,988,035    | 0.0261                    | 0.0949                                  |
| rs3218018  | 21,988,139    | 0.0067                    | 0.0288                                  |
| rs3217992  | 21,993,223    | 0.0924                    | 0.0945                                  |
| rs1063192  | 21,993,367    | 0.6338                    | 0.2897                                  |
| rs2069426  | 21,996,273    | 0.0005                    | 0.0290                                  |
| rs2069422  | 21,998,026    | 0.0129                    | 0.0518                                  |
| rs2157719  | 22,023,366    | 0.4433                    | 0.1674                                  |
| rs1759417  | 22,023,389    | 0.0970                    | 0.1390                                  |
| rs2151280  | 22,024,719    | 0.0436                    | 0.0218                                  |
| rs1412829  | 22,033,926    | 0.4906                    | 0.1858                                  |
| rs1333034  | 22,034,122    | 0.0340                    | 0.1134                                  |
| rs10120688 | 22,046,499    | 0.0336                    | 0.0183                                  |
| rs1011970  | 22,052,134    | 0.0201                    | 0.1020                                  |
| rs4977756  | 22,058,652    | 0.4140                    | 0.2131                                  |
| rs1412832  | 22,067,543    | 0.1410                    | 0.5545                                  |
| rs10116277 | 22,071,397    | 0.2803                    | 0.2622                                  |
| rs1547705  | 22,072,375    | 0.0019                    | 0.0263                                  |
| rs1333040  | 22,073,404    | 0.1189                    | 0.6565                                  |
| rs2383207  | 22,105,959    | 0.2818                    | 0.2236                                  |
| rs1333050  | 22,115,913    | 0.6839                    | 0.7448                                  |

(c)

| SNP        | Location (bp) | Score ( $\chi^2$ ) | <i>P</i> value        |
|------------|---------------|--------------------|-----------------------|
| rs10757260 | 21,943,137    | 12.30              | 0.502                 |
| rs7041637  | 21,951,866    | 12.68              | 0.378                 |
| rs2811708  | 21,963,422    | 12.40              | 0.195                 |
| rs3731239  | 21,964,218    | 12.33              | 0.379                 |
| rs2811709  | 21,970,151    | 13.22              | 0.030                 |
| rs4074785  | 21,971,583    | 13.08              | 0.711                 |
| rs3731217  | 21,974,661    | 13.40              | $8.92 \times 10^{-4}$ |
| rs2811712  | 21,988,035    | 12.92              | 0.017                 |
| rs3218018  | 21,988,139    | 12.82              | $3.05 \times 10^{-3}$ |
| rs3217992  | 21,993,223    | 12.77              | 0.205                 |

|            |            |       |                       |
|------------|------------|-------|-----------------------|
| rs1063192  | 21,993,367 | 12.56 | 0.751                 |
| rs2069426  | 21,996,273 | 12.63 | 6.13x10 <sup>-4</sup> |
| rs2069422  | 21,998,026 | 12.61 | 9.65x10 <sup>-3</sup> |
| rs2157719  | 22,023,366 | 12.62 | 0.943                 |
| rs1759417  | 22,023,389 | 12.66 | 0.133                 |
| rs2151280  | 22,024,719 | 12.46 | 0.202                 |
| rs1412829  | 22,033,926 | 12.53 | 0.927                 |
| rs1333034  | 22,034,122 | 12.53 | 0.032                 |
| rs10120688 | 22,046,499 | 12.47 | 0.180                 |
| rs1011970  | 22,052,134 | 12.52 | 0.011                 |
| rs4977756  | 22,058,652 | 12.52 | 0.881                 |
| rs1412832  | 22,067,543 | 12.55 | 0.643                 |
| rs10116277 | 22,071,397 | 12.64 | 0.653                 |
| rs1547705  | 22,072,375 | 12.75 | 0.006                 |
| rs1333040  | 22,073,404 | 12.70 | 0.458                 |
| rs2383207  | 22,105,959 | 12.41 | 0.619                 |
| rs1333050  | 22,115,913 | 12.42 | 0.707                 |

**Supplementary Table 3: Details of haplotype, logistic regression and ARG analysis of the 174kb region encompassing rs3731217.** (a)

Haplotypes analysis of rs3731239, rs2811709, rs4074785, rs3731217, rs2811712, rs3218018. (b) Single SNP and conditional (on rs3731217) logistic regression analysis. (c) Results from ARG analysis using Margarita.

| Study   | Risk allele status | All cases                                        |          | B cell only                                      |          |
|---------|--------------------|--------------------------------------------------|----------|--------------------------------------------------|----------|
|         |                    | No deletion                                      | Deletion | No deletion                                      | Deletion |
| German  | Carrier            | 49                                               | 20       | 44                                               | 16       |
|         | Non-carrier        | 224                                              | 94       | 213                                              | 59       |
|         |                    | OR: 0.97 (95%CI: 0.52-1.77)<br><i>P</i> = 0.93   |          | OR: 1.31 (95%CI: 0.64-2.58)<br><i>P</i> = 0.40   |          |
| UK-GWA2 | Carrier            | 10                                               | 1        | 8                                                | 1        |
|         | Non-carrier        | 34                                               | 20       | 26                                               | 8        |
|         |                    | OR: 0.17 (95% CI: 0.004-1.39)<br><i>P</i> = 0.07 |          | OR: 0.40 (95% CI: 0.008-3.99)<br><i>P</i> = 0.42 |          |

**Supplementary Table 4: Correlation between carrier status for the rs3731217 (*CDKN2A*) risk allele and deletion of the locus in leukemic blasts in an available subset of the German and UK-GWA2 cases.** Confidence intervals were calculated using Fisher's exact test.

| Gene                      | nsSNP      | Change | D' v rs3731217 | r <sup>2</sup> v rs3731217 |
|---------------------------|------------|--------|----------------|----------------------------|
| <b>CDKN2A - Isoform 1</b> | rs45476696 | N153D  | na             | na                         |
|                           | rs3731249  | T148A  | 1.00           | 0.0029                     |
|                           | rs6413464  | S127A  | na             | na                         |
|                           | rs34170727 | C124R  | na             | na                         |
|                           | rs6413463  | Q123H  | na             | na                         |
|                           | rs35741010 | T102A  | na             | na                         |
|                           | rs34886500 | W99R   | na             | na                         |
|                           | rs11552822 | Y84D   | na             | na                         |
|                           | rs43968276 | Q83H   | na             | na                         |
|                           | rs11552823 | L81P   | na             | na                         |
|                           | rs36204594 | V60A   | na             | na                         |
| <b>CDKN2A - Isoform 3</b> | rs75256133 | L101P  | na             | na                         |
|                           | rs45456595 | R63G   | na             | na                         |
| <b>CDKN2A - Isoform 4</b> | rs35741010 | D157G  | na             | na                         |
|                           | rs34886500 | L154P  | na             | na                         |
|                           | rs4987127  | R147G  | na             | na                         |
|                           | rs11552822 | L139R  | na             | na                         |
|                           | rs3731190  | S58P   | na             | na                         |
|                           | rs1801022  | L36P   | na             | na                         |

**Supplementary Table 5: Pair-wise LD statistics between rs3731217 and coding SNPs within the 9p21.3 region based data from HapMap and 1000Genomes.** The amino acid change of each SNP is shown.

na = no data available

| SNP        | P value | SNP type | Predicted motif        | Position                | Program  | Score  |
|------------|---------|----------|------------------------|-------------------------|----------|--------|
|            |         |          | V\$IRF7_01             | 21,861,687 - 21,861,687 | Transfac | 2.91   |
|            |         |          | V\$HNF3B_01            | 21,861,742 - 21,861,742 | Transfac | 2.12   |
|            |         |          | V\$EVI1_02             | 21,863,209 - 21,863,209 | Transfac | 2.51   |
| rs11515    | 0.0249  | imputed  |                        | 21,906,551              |          |        |
|            |         |          | MA0010.pfm             | 21,936,028 - 21,936,028 | EEL      | 83.69  |
|            |         |          | MA0010.pfm             | 21,940,754 - 21,940,754 | EEL      | 90.24  |
|            |         |          | MA0001.pfm             | 21,947,559 - 21,947,559 | EEL      | 86.68  |
|            |         |          | V\$SOX5_01             | 21,947,637 - 21,947,637 | Transfac | 1.64   |
|            |         |          | V\$EVI1_04             | 21,948,099 - 21,948,099 | Transfac | 2.1    |
|            |         |          | V\$CEBPA_01            | 21,948,108 - 21,948,108 | Transfac | 1.84   |
|            |         |          | V\$MEIS1BHOXA9_02      | 21,948,121 - 21,948,121 | Transfac | 2.35   |
|            |         |          | MA0010.pfm             | 21,951,062 - 21,951,062 | EEL      | 124.59 |
|            |         |          | MA0010.pfm             | 21,953,911 - 21,953,911 | EEL      | 86.13  |
|            |         |          | MA0010.pfm             | 21,954,908 - 21,954,908 | EEL      | 84.43  |
|            |         |          | V\$CDPCR3_01           | 21,960,036 - 21,960,036 | Transfac | 2.42   |
| rs2518719  | 0.0005  | imputed  |                        | 21,960,427              |          |        |
|            |         |          | V\$PAX5_01             | 21,961,131 - 21,961,131 | Transfac | 1.66   |
| rs3731246  | 0.0017  | imputed  |                        | 21,961,989              |          |        |
| rs2811708  | 0.1752  | typed    |                        | 21,963,422              |          |        |
|            |         |          | MA0010.pfm             | 21,963,479 - 21,963,479 | EEL      | 86     |
| rs3731239  | 0.1342  | typed    |                        | 21,964,218              |          |        |
| rs3731238  | 0.1261  | imputed  |                        | 21,965,561              |          |        |
|            |         |          | MA0008.pfm             | 21,968,311 - 21,968,311 | EEL      | 102.34 |
| rs2811709  | 0.0168  | typed    |                        | 21,970,151              |          |        |
| rs4074785  | 0.9205  | typed    |                        | 21,971,583              |          |        |
| rs3731222  | 0.0005  | imputed  |                        | 21,973,914              |          |        |
| rs3731221  | 0.1261  | imputed  |                        | 21,974,010              |          |        |
| rs3731217  | 0.0004  | typed    |                        | 21,974,661              |          |        |
|            |         |          | V\$OCT1_07             | 21,976,817 - 21,976,817 | Transfac | 1.68   |
| rs3731211  | 0.1396  | imputed  |                        | 21,976,847              |          |        |
|            |         |          | V\$MEF2_04             | 21,976,924 - 21,976,924 | Transfac | 2.15   |
|            |         |          | V\$NKX61_01            | 21,976,922 - 21,976,922 | Transfac | 1.92   |
|            |         |          | V\$TCF11MAFG_01        | 21,976,954 - 21,976,954 | Transfac | 2.71   |
|            |         |          | V\$SREBP1_01           | 21,976,955 - 21,976,955 | Transfac | 2.05   |
| rs3731204  | 0.0005  | imputed  |                        | 21,977,584              |          |        |
| rs10757262 | 0.1153  | imputed  |                        | 21,977,874              |          |        |
|            |         |          | V\$ISRE_01             | 21,978,118 - 21,978,118 | Transfac | 1.71   |
|            |         |          | V\$IRF2_01             | 21,978,117 - 21,978,117 | Transfac | 2.17   |
|            |         |          | V\$IRF1_01             | 21,978,117 - 21,978,117 | Transfac | 2.11   |
|            |         |          | V\$FREAC7_01           | 21,978,299 - 21,978,299 | Transfac | 2.11   |
| rs3731201  | 0.1153  | imputed  |                        | 21,978,896              |          |        |
|            |         |          | V\$NFAT_Q6             | 21,979,462 - 21,979,462 | Transfac | 2.12   |
| rs3731198  | 0.0005  | imputed  |                        | 21,979,477              |          |        |
|            |         |          | V\$IK1_01              | 21,980,345 - 21,980,345 | Transfac | 2.04   |
|            |         |          | V\$IK2_01              | 21,980,345 - 21,980,345 | Transfac | 2.33   |
| rs7036656  | 0.1496  | imputed  |                        | 21,980,457              |          |        |
|            |         |          | MA0010.pfm             | 21,982,126 - 21,982,126 | EEL      | 85.88  |
|            |         |          | V\$MEF2_03             | 21,982,434 - 21,982,434 | Transfac | 1.9    |
|            |         |          | module1_hg17_mod114553 | 21,984,839 - 21,985,839 | PReMod   | 170    |
|            |         |          | V\$GATA1_03            | 21,984,000 - 21,985,000 | Transfac | 2.56   |
|            |         |          | V\$NFY_Q6              | 21,984,997 - 21,984,997 | Transfac | 1.65   |
|            |         |          | V\$IRF1_01             | 21,985,297 - 21,985,297 | Transfac | 1.67   |
| rs3218020  | 0.0489  | imputed  |                        | 21,987,872              |          |        |
| rs2811712  | 0.0203  | typed    |                        | 21,988,035              |          |        |
| rs3218018  | 0.0048  | typed    |                        | 21,988,139              |          |        |
|            |         |          | V\$GATA1_05            | 21,988,546 - 21,988,546 | Transfac | 2.08   |
|            |         |          | V\$AP1FJ_Q2            | 21,988,554 - 21,988,554 | Transfac | 1.81   |
|            |         |          | MA0010.pfm             | 21,988,920 - 21,988,920 | EEL      | 84.42  |
| rs3218005  | 0.0132  | imputed  |                        | 21,990,247              |          |        |
| rs3218002  | 0.0132  | imputed  |                        | 21,990,841              |          |        |
|            |         |          | V\$POU3F2_02           | 21,992,152 - 21,992,152 | Transfac | 2.99   |
| rs3217992  | 0.0903  | typed    |                        | 21,993,223              |          |        |
| rs1063192  | 0.6759  | typed    |                        | 21,993,367              |          |        |
|            |         |          | V\$BACH1_01            | 21,994,707 - 21,994,707 | Transfac | 2.58   |
| rs3217986  | 0.6851  | imputed  |                        | 21,995,330              |          |        |
|            |         |          | V\$NFKAPPAB50_01       | 21,995,756 - 21,995,756 | Transfac | 1.76   |
|            |         |          | V\$STAT3_01            | 21,996,135 - 21,996,135 | Transfac | 1.67   |
|            |         |          | V\$MYB_Q6              | 21,996,189 - 21,996,189 | Transfac | 2.08   |
|            |         |          | V\$HEN1_02             | 21,996,224 - 21,996,224 | Transfac | 1.78   |
|            |         |          | V\$COMP1_01            | 21,996,244 - 21,996,244 | Transfac | 2.76   |
|            |         |          | V\$ER_Q6               | 21,996,250 - 21,996,250 | Transfac | 1.7    |
| rs2069426  | 0.0003  | typed    |                        | 21,996,273              |          |        |
|            |         |          | V\$FOXJ2_01            | 21,996,741 - 21,996,741 | Transfac | 1.86   |
|            |         |          | V\$HFH3_01             | 21,996,739 - 21,996,739 | Transfac | 1.76   |
|            |         |          | V\$HNF3B_01            | 21,996,741 - 21,996,741 | Transfac | 2.34   |

|            |        |         |                        |                         |          |       |
|------------|--------|---------|------------------------|-------------------------|----------|-------|
|            |        |         | V\$HFH1_01             | 21,996,739 - 21,996,739 | Transfac | 2.09  |
|            |        |         | V\$FOX03_01            | 21,996,739 - 21,996,739 | Transfac | 1.64  |
| rs2069422  | 0.0099 | typed   |                        | 21,998,026              |          |       |
|            |        |         | V\$CP2_01              | 21,998,807 - 21,998,807 | Transfac | 1.76  |
|            |        |         | V\$STAT1_01            | 21,998,862 - 21,998,862 | Transfac | 1.84  |
|            |        |         | V\$STAT3_01            | 21,998,862 - 21,998,862 | Transfac | 1.72  |
|            |        |         | V\$AP4_01              | 21,998,864 - 21,998,864 | Transfac | 1.7   |
|            |        |         | V\$P53_02              | 21,998,935 - 21,998,935 | Transfac | 1.72  |
|            |        |         | module1_hg17_mod114554 | 21,999,209 - 22,000,209 | PreMod   | 210   |
|            |        |         | V\$IRF2_01             | 21,999,644 - 21,999,644 | Transfac | 2.39  |
|            |        |         | V\$IRF1_01             | 21,999,644 - 21,999,644 | Transfac | 2.86  |
|            |        |         | V\$BRN2_01             | 22,000,120 - 22,000,120 | Transfac | 1.64  |
|            |        |         | V\$AML1_01             | 22,000,166 - 22,000,166 | Transfac | 1.68  |
|            |        |         | V\$MEIS1BHOXA9_02      | 22,000,200 - 22,000,200 | Transfac | 2.3   |
|            |        |         | V\$MEIS1_01            | 22,000,203 - 22,000,203 | Transfac | 1.69  |
|            |        |         | V\$TGIF_01             | 22,000,203 - 22,000,203 | Transfac | 2.29  |
|            |        |         | V\$GATA1_03            | 22,000,260 - 22,000,260 | Transfac | 2.4   |
|            |        |         | V\$RFX1_01             | 22,000,369 - 22,000,369 | Transfac | 1.79  |
|            |        |         | V\$CEBPA_01            | 22,000,366 - 22,000,366 | Transfac | 1.93  |
|            |        |         | V\$NRSF_01             | 22,001,118 - 22,001,118 | Transfac | 4.61  |
|            |        |         | V\$ZIC1_01             | 22,001,144 - 22,001,144 | Transfac | 2.91  |
|            |        |         | V\$ZIC2_01             | 22,001,144 - 22,001,144 | Transfac | 2.47  |
|            |        |         | V\$ZIC3_01             | 22,001,144 - 22,001,144 | Transfac | 2.96  |
|            |        |         | V\$FOXJ2_02            | 22,001,290 - 22,001,290 | Transfac | 2.57  |
|            |        |         | V\$EV11_01             | 22,001,309 - 22,001,309 | Transfac | 2.48  |
| rs13298881 | 0.0013 | imputed |                        | 22,002,051              |          |       |
|            |        |         | V\$PAX6_01             | 22,002,206 - 22,002,206 | Transfac | 1.92  |
|            |        |         | V\$USF_Q6              | 22,002,216 - 22,002,216 | Transfac | 1.88  |
|            |        |         | V\$PAX2_01             | 22,002,253 - 22,002,253 | Transfac | 1.67  |
|            |        |         | V\$RP58_01             | 22,002,305 - 22,002,305 | Transfac | 2.31  |
|            |        |         | V\$YY1_02              | 22,002,317 - 22,002,317 | Transfac | 1.84  |
|            |        |         | V\$GATA2_01            | 22,002,313 - 22,002,313 | Transfac | 1.76  |
|            |        |         | V\$PPARA_01            | 22,002,366 - 22,002,366 | Transfac | 2.12  |
|            |        |         | V\$E47_02              | 22,002,365 - 22,002,365 | Transfac | 1.65  |
|            |        |         | V\$AREB6_03            | 22,002,363 - 22,002,363 | Transfac | 1.65  |
|            |        |         | V\$EV11_06             | 22,002,436 - 22,002,436 | Transfac | 2.24  |
|            |        |         | V\$FAC1_01             | 22,002,518 - 22,002,518 | Transfac | 1.64  |
| rs10811640 | 0.0209 | imputed |                        | 22,003,411              |          |       |
| rs10811641 | 0.0304 | imputed |                        | 22,004,137              |          |       |
| rs2106120  | 0.0199 | imputed |                        | 22,007,101              |          |       |
|            |        |         | V\$EV11_01             | 22,007,535 - 22,007,535 | Transfac | 2.33  |
|            |        |         | V\$EV11_04             | 22,007,540 - 22,007,540 | Transfac | 1.97  |
| rs2106119  | 0.0197 | imputed |                        | 22,007,550              |          |       |
| rs7044859  | 0.0208 | imputed |                        | 22,008,781              |          |       |
| rs10757264 | 0.0353 | imputed |                        | 22,009,732              |          |       |
| rs10965212 | 0.0297 | imputed |                        | 22,013,795              |          |       |
| rs10811644 | 0.0114 | imputed |                        | 22,015,067              |          |       |
| rs7035484  | 0.0119 | imputed |                        | 22,015,240              |          |       |
| rs10738604 | 0.0365 | imputed |                        | 22,015,493              |          |       |
| rs1591136  | 0.0274 | imputed |                        | 22,016,834              |          |       |
| rs598664   | 0.0244 | imputed |                        | 22,017,551              |          |       |
| rs7049105  | 0.0352 | imputed |                        | 22,018,801              |          |       |
| rs10965215 | 0.0322 | imputed |                        | 22,019,445              |          |       |
| rs662463   | 0.0223 | imputed |                        | 22,020,438              |          |       |
| rs10115049 | 0.0323 | imputed |                        | 22,022,119              |          |       |
|            |        |         | V\$GRE_C               | 22,022,268 - 22,022,268 | Transfac | 2.06  |
|            |        |         | V\$NCX_01              | 22,023,331 - 22,023,331 | Transfac | 1.65  |
|            |        |         | V\$MEIS1AHOXA9_01      | 22,023,518 - 22,023,518 | Transfac | 1.65  |
|            |        |         | V\$FOX04_01            | 22,023,551 - 22,023,551 | Transfac | 2.17  |
| rs2151280  | 0.0450 | typed   |                        | 22,024,719              |          |       |
|            |        |         | V\$P53_01              | 22,027,416 - 22,027,416 | Transfac | 1.97  |
|            |        |         | V\$FOX04_01            | 22,027,470 - 22,027,470 | Transfac | 1.66  |
|            |        |         | V\$HFH1_01             | 22,027,472 - 22,027,472 | Transfac | 1.76  |
|            |        |         | V\$AML1_01             | 22,027,686 - 22,027,686 | Transfac | 1.68  |
|            |        |         | V\$HAND1E47_01         | 22,027,870 - 22,027,870 | Transfac | 1.81  |
|            |        |         | V\$CEBPB_02            | 22,027,010 - 22,028,010 | Transfac | 2.26  |
|            |        |         | V\$BRACH_01            | 22,028,291 - 22,028,291 | Transfac | 3.68  |
|            |        |         | V\$POU3F2_01           | 22,028,426 - 22,028,426 | Transfac | 1.68  |
|            |        |         | V\$FOXJ2_01            | 22,029,039 - 22,029,039 | Transfac | 1.86  |
|            |        |         | V\$SRYP_02             | 22,031,110 - 22,031,110 | Transfac | 2.1   |
|            |        |         | MA0009.pfm             | 22,031,331 - 22,031,331 | EEL      | 83.56 |
| rs1360590  | 0.0377 | imputed |                        | 22,031,443              |          |       |
|            |        |         | V\$P300_01             | 22,031,852 - 22,031,852 | Transfac | 1.87  |
|            |        |         | V\$STAT_01             | 22,031,004 - 22,032,004 | Transfac | 2.54  |
|            |        |         | V\$FOX04_02            | 22,033,615 - 22,033,615 | Transfac | 2.47  |
|            |        |         | V\$FOX03_01            | 22,033,615 - 22,033,615 | Transfac | 1.81  |
| rs1333035  | 0.0272 | imputed |                        | 22,034,059              |          |       |

|            |        |         |                        |                         |          |        |
|------------|--------|---------|------------------------|-------------------------|----------|--------|
| rs1333034  | 0.0276 | typed   |                        | 22,034,122              |          |        |
|            |        |         | V\$HAND1E47_01         | 22,034,758 - 22,034,758 | Transfac | 2.31   |
|            |        |         | V\$HNF1_01             | 22,034,801 - 22,034,801 | Transfac | 1.97   |
|            |        |         | MA0002.pfm             | 22,037,804 - 22,037,804 | EEL      | 84.43  |
| rs7028570  | 0.0235 | imputed |                        | 22,038,683              |          |        |
|            |        |         | V\$NKX25_01            | 22,040,059 - 22,040,059 | Transfac | 1.81   |
|            |        |         | V\$FAC1_01             | 22,041,151 - 22,041,151 | Transfac | 2.12   |
| rs17694555 | 0.0126 | imputed |                        | 22,041,295              |          |        |
|            |        |         | V\$OCT1_04             | 22,041,417 - 22,041,417 | Transfac | 1.69   |
|            |        |         | V\$MEF2_01             | 22,041,412 - 22,041,412 | Transfac | 2.86   |
|            |        |         | V\$NKX25_02            | 22,042,114 - 22,042,114 | Transfac | 2.04   |
|            |        |         | V\$AP1_01              | 22,042,682 - 22,042,682 | Transfac | 1.86   |
|            |        |         | MA0002.pfm             | 22,042,708 - 22,042,708 | EEL      | 83.8   |
|            |        |         | V\$FOXJ2_01            | 22,042,710 - 22,042,710 | Transfac | 1.79   |
|            |        |         | V\$FOXO3_01            | 22,042,707 - 22,042,707 | Transfac | 1.76   |
|            |        |         | V\$FREAC7_01           | 22,042,709 - 22,042,709 | Transfac | 1.98   |
|            |        |         | V\$FOXO3_01            | 22,042,706 - 22,042,706 | Transfac | 2.23   |
|            |        |         | V\$HFH1_01             | 22,042,706 - 22,042,706 | Transfac | 1.97   |
|            |        |         | V\$HFH3_01             | 22,042,707 - 22,042,707 | Transfac | 1.75   |
|            |        |         | V\$FOXO1_01            | 22,042,705 - 22,042,705 | Transfac | 1.93   |
|            |        |         | V\$FREAC3_01           | 22,042,713 - 22,042,713 | Transfac | 2.2    |
| rs11790231 | 0.0003 | imputed |                        | 22,043,591              |          |        |
| rs10965219 | 0.0189 | imputed |                        | 22,043,687              |          |        |
| rs17756311 | 0.0129 | imputed |                        | 22,043,895              |          |        |
| rs17694572 | 0.0140 | imputed |                        | 22,044,356              |          |        |
|            |        |         | MA0010.pfm             | 22,044,762 - 22,044,762 | EEL      | 106.13 |
| rs10120688 | 0.0346 | typed   |                        | 22,046,499              |          |        |
|            |        |         | V\$TATA_C              | 22,051,465 - 22,051,465 | Transfac | 1.89   |
| rs1011970  | 0.0163 | typed   |                        | 22,052,134              |          |        |
|            |        |         | V\$EVI1_03             | 22,052,947 - 22,052,947 | Transfac | 3.09   |
|            |        |         | V\$GATA_C              | 22,052,947 - 22,052,947 | Transfac | 1.66   |
|            |        |         | V\$AML1_01             | 22,054,577 - 22,054,577 | Transfac | 1.68   |
|            |        |         | V\$AP1_C               | 22,054,603 - 22,054,603 | Transfac | 1.72   |
| rs10811647 | 0.0197 | imputed |                        | 22,055,002              |          |        |
|            |        |         | V\$CART1_01            | 22,055,050 - 22,055,050 | Transfac | 2.13   |
|            |        |         | V\$S8_01               | 22,055,053 - 22,055,053 | Transfac | 1.87   |
|            |        |         | V\$CHX10_01            | 22,055,052 - 22,055,052 | Transfac | 2.34   |
|            |        |         | V\$ZIC1_01             | 22,055,250 - 22,055,250 | Transfac | 2.24   |
|            |        |         | V\$ZIC3_01             | 22,055,250 - 22,055,250 | Transfac | 2.41   |
|            |        |         | V\$CHOP_01             | 22,055,413 - 22,055,413 | Transfac | 2.43   |
|            |        |         | V\$IRF1_01             | 22,055,632 - 22,055,632 | Transfac | 2.2    |
|            |        |         | V\$IRF2_01             | 22,055,632 - 22,055,632 | Transfac | 2.11   |
|            |        |         | MA0010.pfm             | 22,057,236 - 22,057,236 | EEL      | 90.74  |
| rs10811650 | 0.0192 | imputed |                        | 22,057,593              |          |        |
|            |        |         | MA0010.pfm             | 22,061,318 - 22,061,318 | EEL      | 85.2   |
|            |        |         | module1_hg17_mod114556 | 22,063,274 - 22,070,274 | PReMod   | 120    |
|            |        |         | MA0010.pfm             | 22,068,431 - 22,068,431 | EEL      | 86.46  |
| rs1547705  | 0.0017 | typed   |                        | 22,072,375              |          |        |
|            |        |         | V\$AP1_Q4              | 22,087,364 - 22,087,364 | Transfac | 2.05   |
|            |        |         | V\$CEBPB_02            | 22,087,475 - 22,087,475 | Transfac | 1.71   |
| rs6475607  | 0.0226 | imputed |                        | 22,087,693              |          |        |
|            |        |         | V\$AML1_01             | 22,087,919 - 22,087,919 | Transfac | 1.68   |

**Supplementary Table 6: Details of transcription binding sites (TFBSs) as predicted by EEL (using binding profiles from the JASPAR2 database) and the Transfac Matrix Database. The positions of 3 transcriptional regulatory modules as predicted by PReMod are also shown. "Score" refers to the confidence value assigned to each predicted binding region by the three different programs. The predicted binding sites cluster in 3 regions (highlighted red, green and blue). For comparison, the observed and imputed SNPs and associated *P* values are shown.**

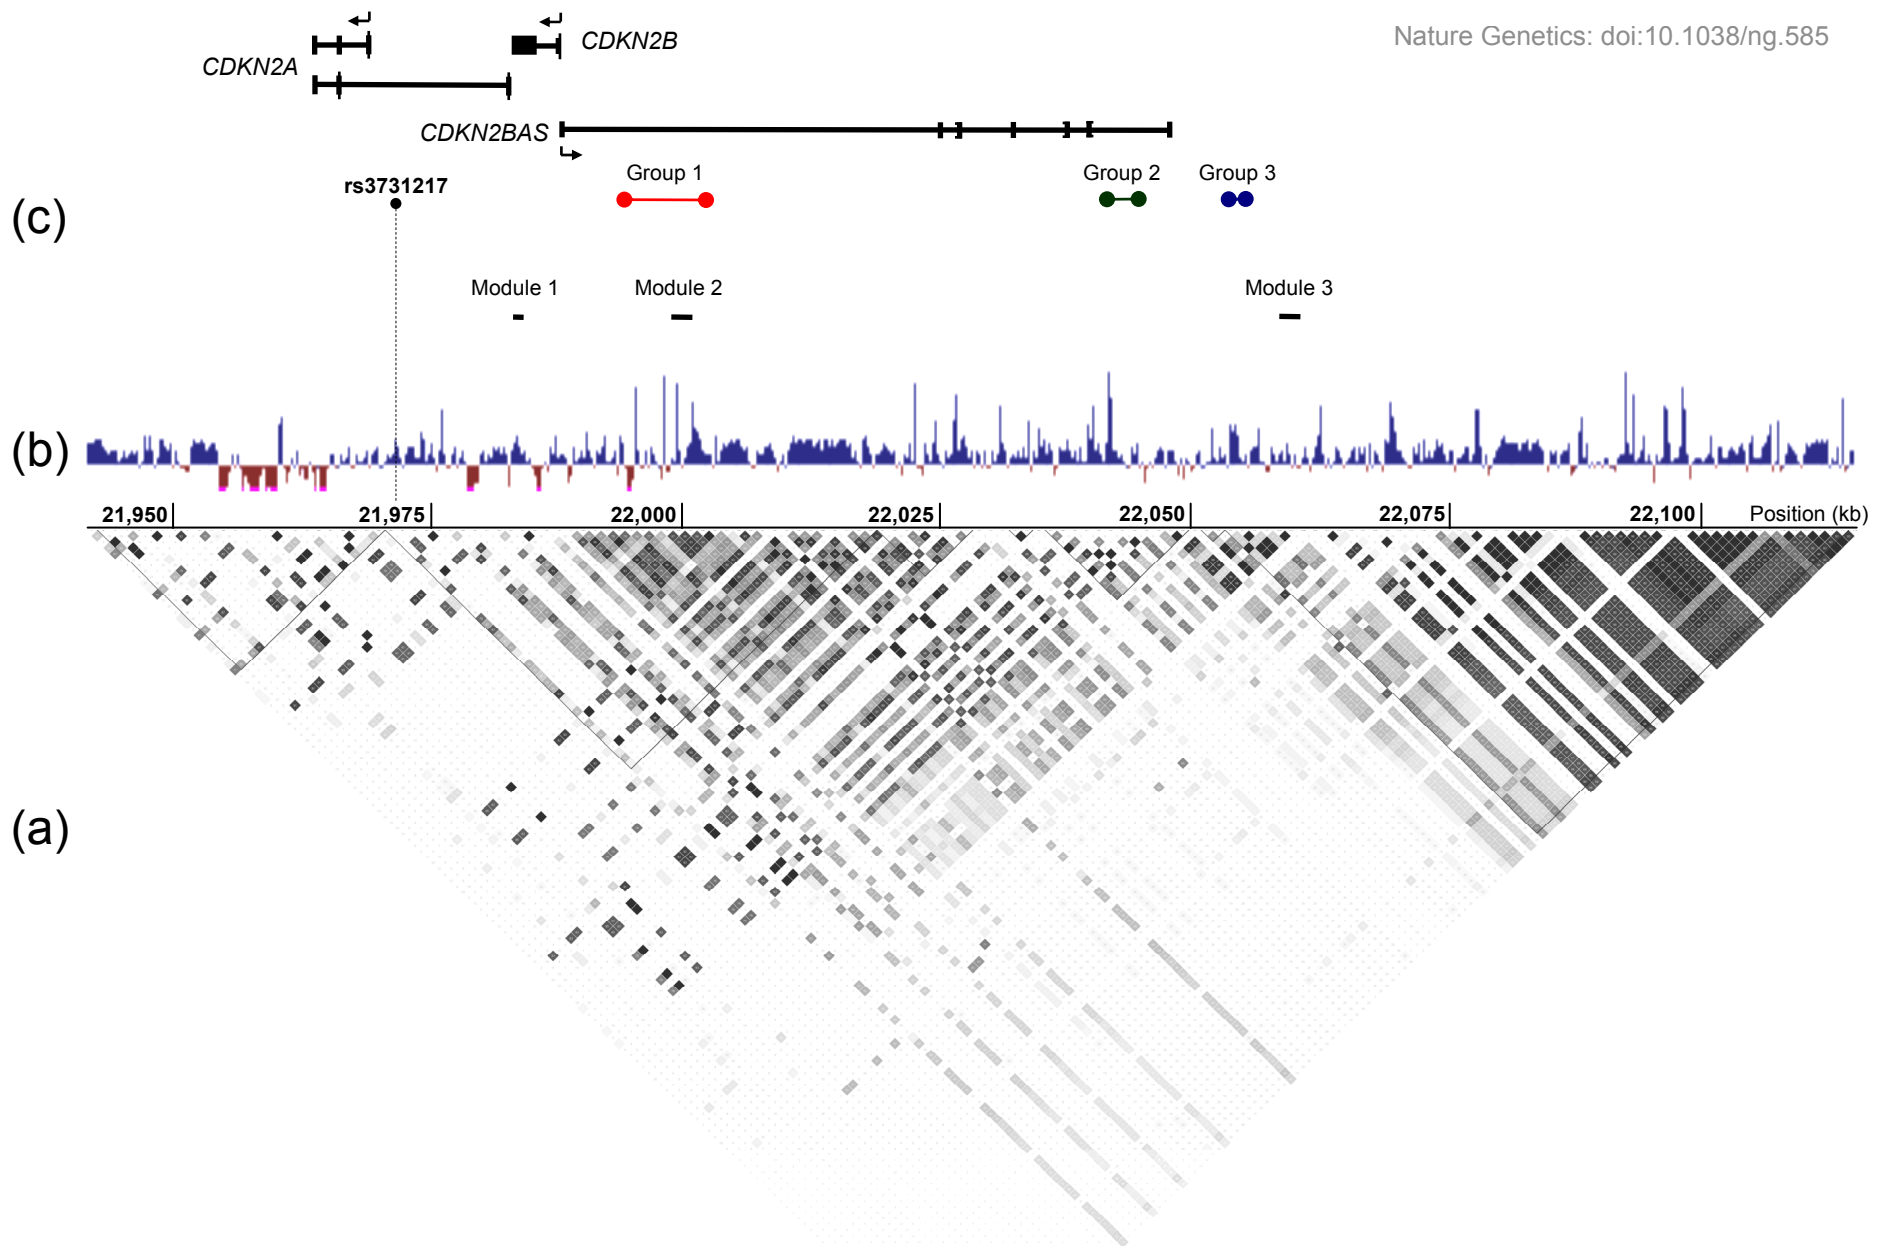

**Supplementary Figure 1: Details of the 174kb LD region at 9p21.3.** (a) LD statistics ( $r^2$ ) from HapMap phase II data. The darker shading indicates strong LD between SNPs. (b) Sequence conservation across the region in mammals. (c) Regions with high densities of TFBSs are shown: modules (predicted by PReMod) and groups (predicted by EEL and the Transfac Matrix Database). Also shown are the positions of the genes encoded by the region and the position of rs3731217.



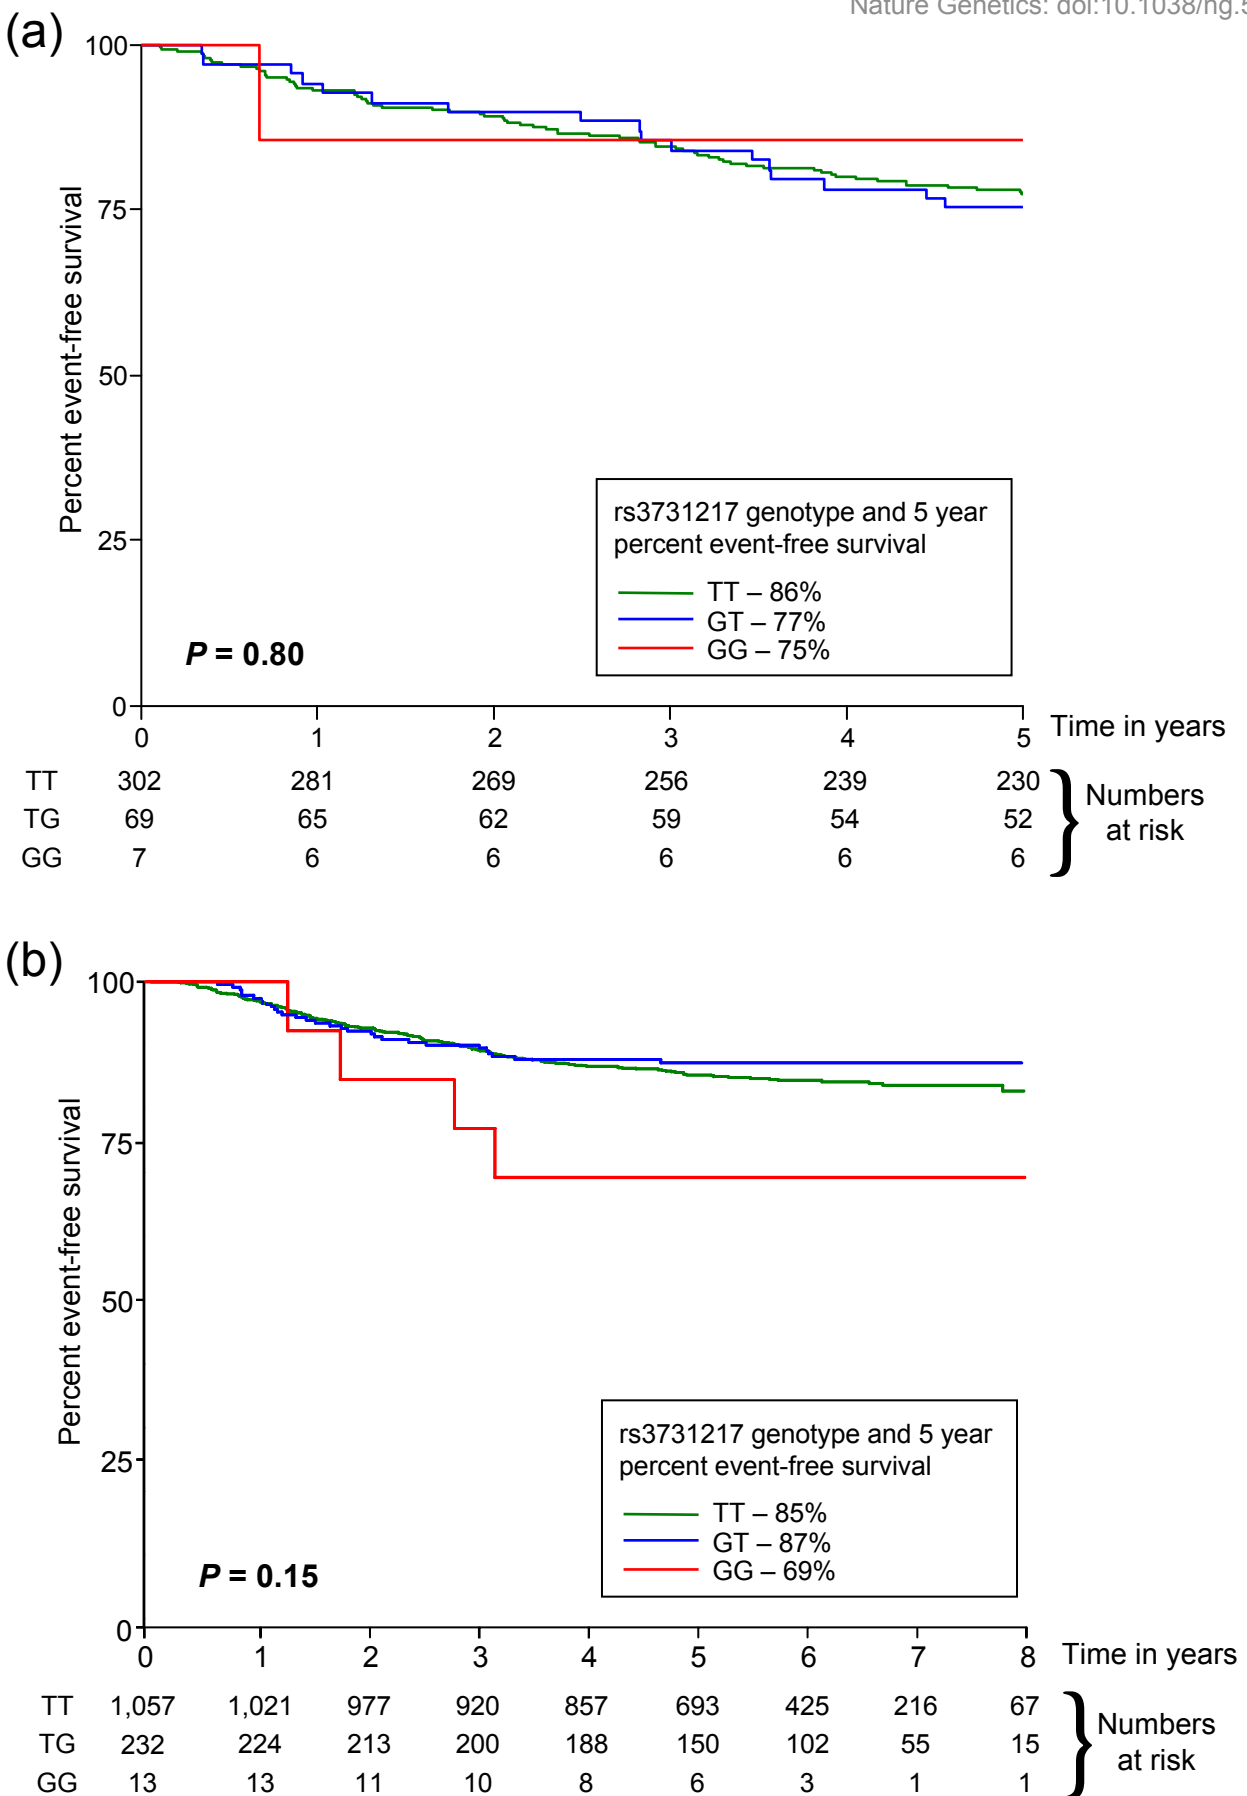

**Supplementary Figure 2: Relationship between event-free survival and rs3731217 genotype.** Kaplan-Meier event-free survival curves are shown for (a) 378 MRC97(99) patients from UK-GWA2 study and (b) 1,302 BFM patients from the German series.

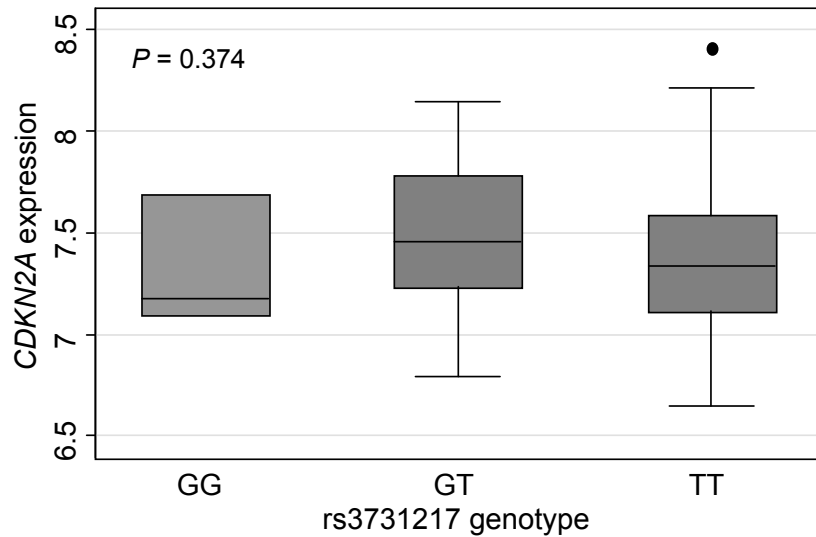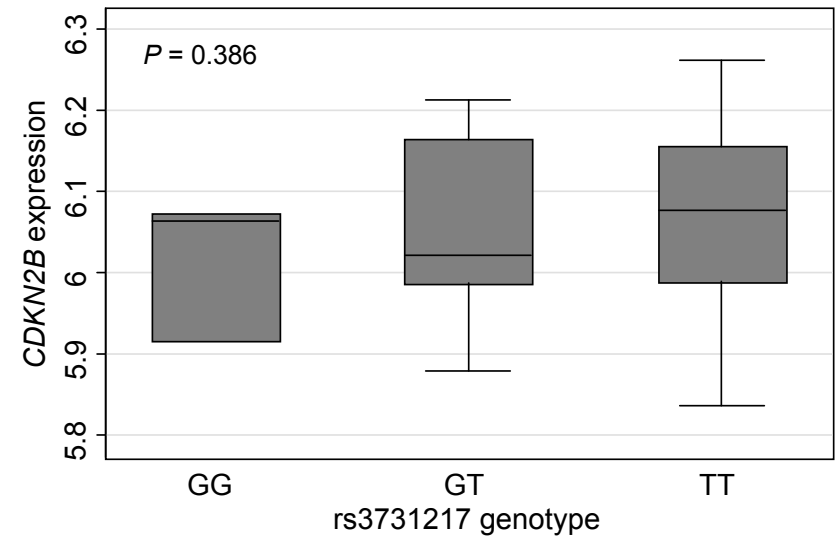

**Supplementary Figure 3: Relationship between rs3731217 genotypes and normalized lymphocyte *CDKN2A* and *CDKN2B* mRNA expression.** Expression of genes (normalized  $-\log_2$  levels) is based on data from analysis of 90 Epstein-Barr virus-transformed lymphoblastoid cell lines using Sentrix Human-6 Expression BeadChip (Illumina, San Diego, USA). Data was recovered using WGAViewer Version 1.25. Differences in the distribution of expression by SNP genotype were compared using a Wilcoxon-type test for trend.
